# Supplementary material
Source: publisher figshare collection journal article supplement (https://tandf.figshare.com/ndownloader/files/13243433)
Supplement: Supplementary file 1 [file 13243433]

**Supplementary Materials**

1. **Supplementary Figure S1:** Experimental study on the effect of pH and stability of partially purified tannase from *Bacillus gottheilii* M2S2with PUF in PBR. Results shown are mean of triplicates with a standard deviation.
2. **Supplementary Figure S2:** Experimental study on the effect of temperature and stability of partially purified tannase from *Bacillus gottheilii* M2S2with PUF in PBR. Results shown are mean of triplicates with a standard deviation.
3. **Supplementary Figure S3:** Experimental study on the Lineweaver-Burk plot to determine Vmax and Km with methyl gallate as substrate. Results shown are mean of triplicates with a standard deviation.

**Figure S1:**

**Figure S2:**

**Figure S3:**
